# Supplementary material for: Catalytic degradation of azo dyes by bimetallic nanoparticles loaded in smart polymer microgels
Source: Royal Society of Chemistry journal article supplement (doi:10.1039/d2ra07932a), 2023-01-01
Supplement: d2ra07932a1.pdf [file d2ra07932a1.pdf]

# Catalytic degradation of azo dyes by bimetallic nanoparticles loaded in smart polymer microgels

Muhammad Arif <sup>a,\*</sup>,

<sup>a</sup> Department of Chemistry, School of Science, University of Management and Technology,

Lahore 54770, Pakistan

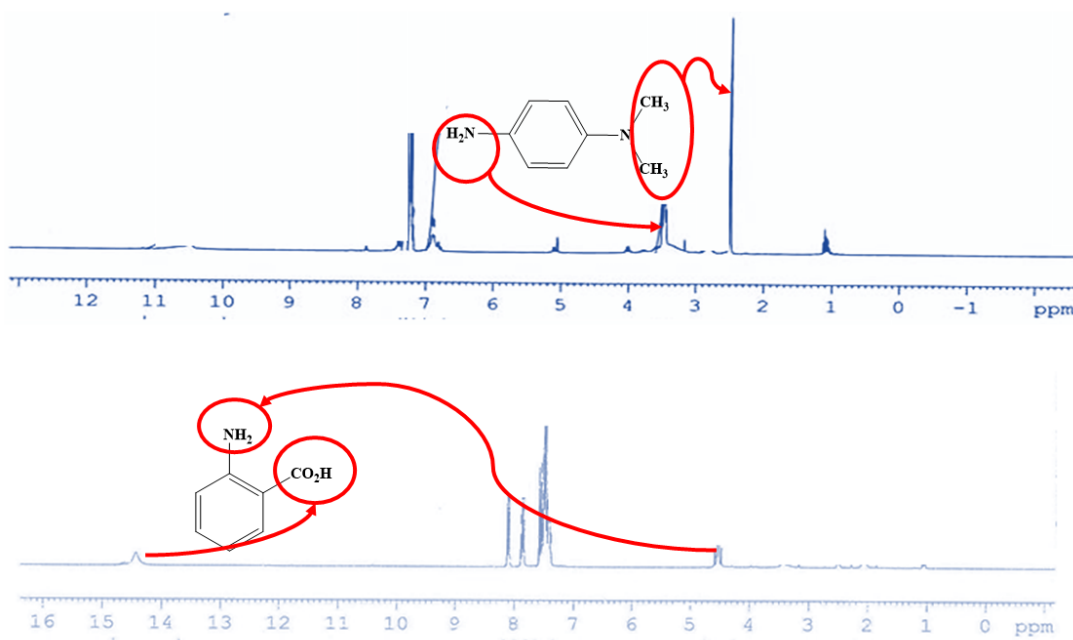

**Fig. 1S.** <sup>1</sup>H NMR of products obtained after catalytic degradation and separation of MRe dye in the presence of Ag/Ni-P(NMA-MAa) and NaBH<sub>4</sub>.

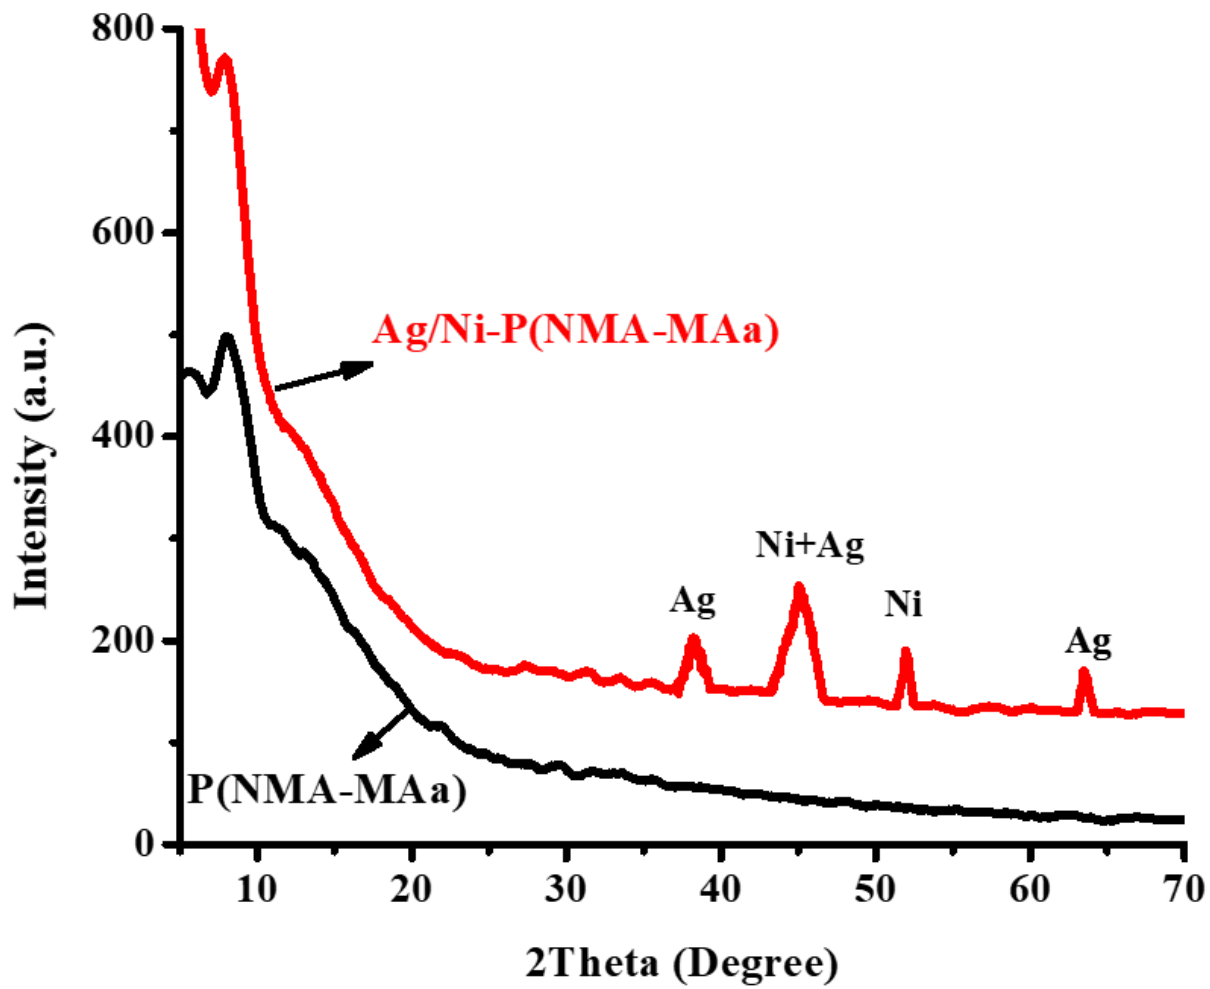

Fig. 2S. XRD results of P(NMA-MAa) and Ag/Ni-P(NMA-MAa).

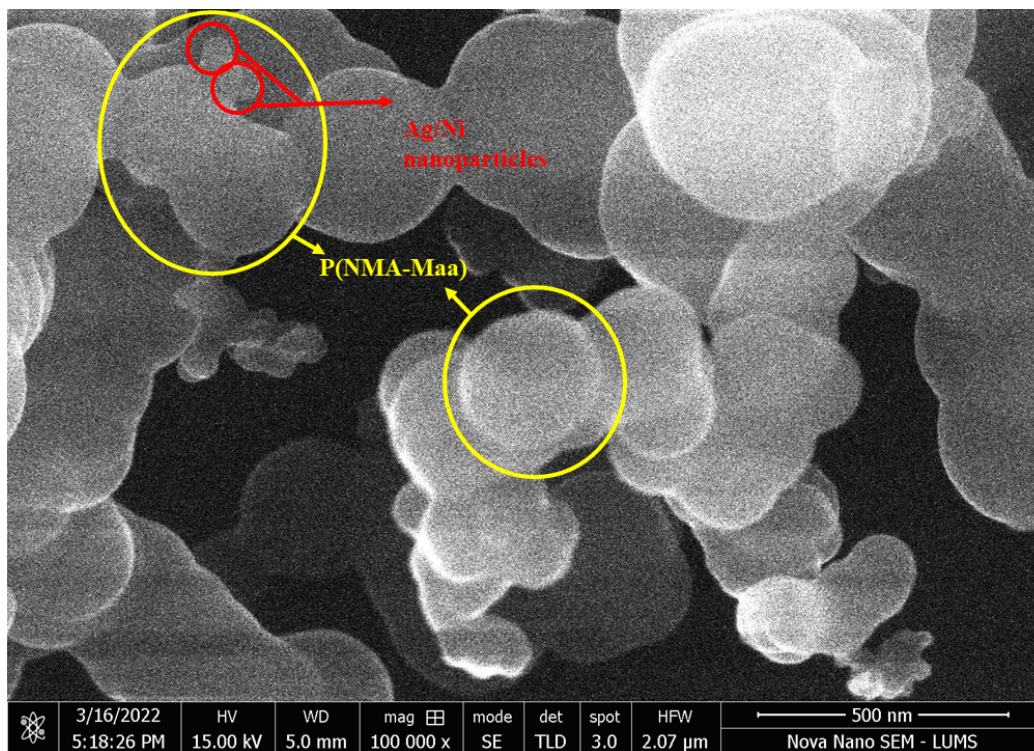

**Fig. 3S.** STEM image of Ag/Ni nanoparticles loaded in P(NMA-MAa) at 26°C.

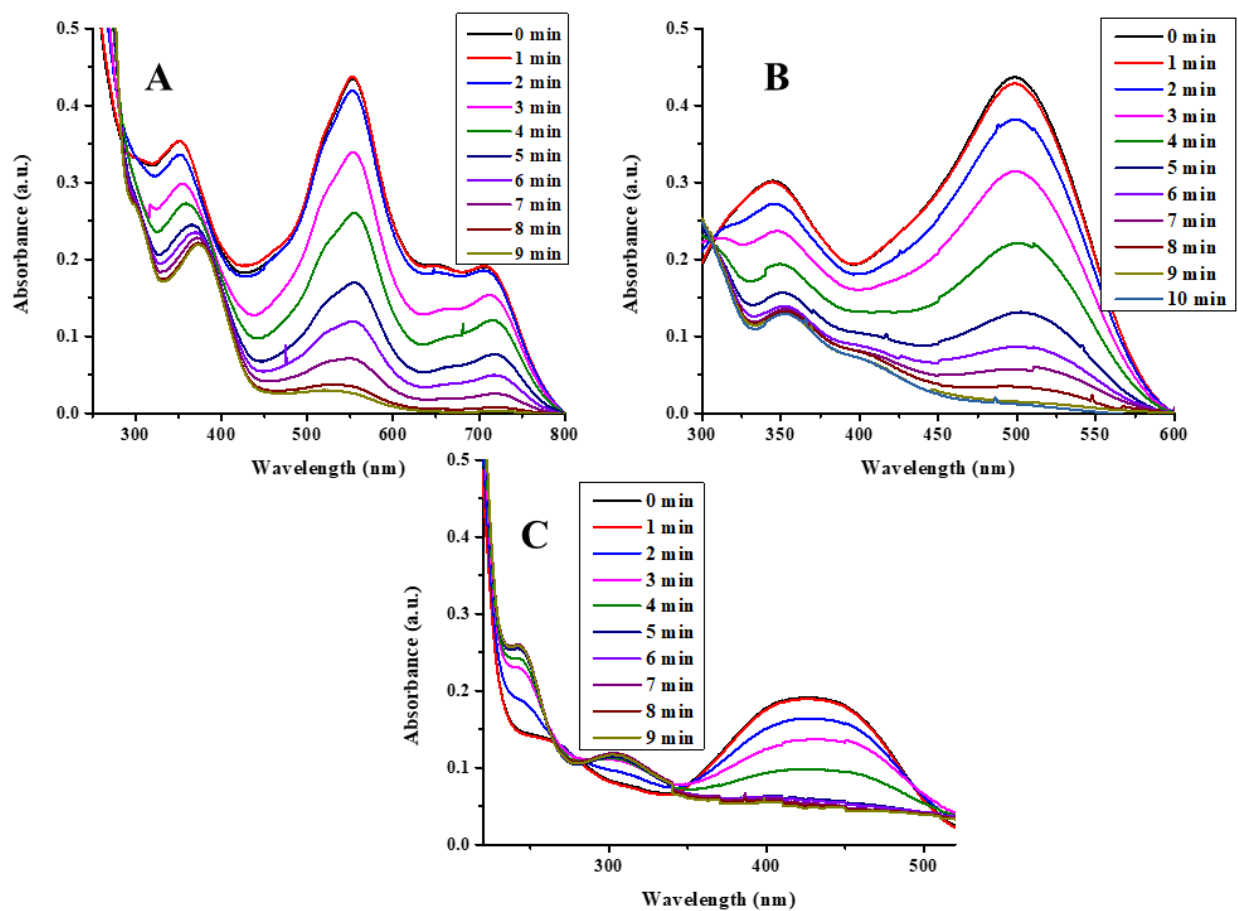

**Fig. 5S.** Catalytic degradation/reduction of (A) EBIT (B) CRe and (C) MRe dyes in the presence of Ag/Ni-P(NMA-MAa) and NaBH<sub>4</sub>.
